# Supplementary material for: Critical Dialogues for Action is a Research Methodology for Transforming Engagement into Impact
Source: Research Square preprint supplement (doi:10.21203/rs.3.rs-8553339/v1), 2026-02-11
Supplement: Supplementary file 1 [file 173d45457411542152333c85.docx]

**Appendix B. Critical Dialogues for Action (CDFA) Fidelity & Reflexivity Tool**

This tool guides facilitators and participants in planning, delivering, and reflecting on Critical Dialogues for Action (CDFA) sessions. It supports fidelity to CDFA principles, reflexivity about power and process, and continuous improvement. For each principle, reflect on whether it was Well-Executed (3), Partially Present (2), or Needs Improvement (1), and assign a corresponding optional score from 1-3, alongside any noted observations or action items.

| **CDFA Fidelity & Reflexivity Principle** | **Scoring**   **(1-3)** | **Observations / Reflections** |
| --- | --- | --- |
| **1. Accountability**  Dialogue is framed as an accountable space where facilitators and participants are responsible for speaking authentically, receiving feedback, naming harm, and committing to unpacking assumptions. |  |  |
| **2. Humility**  Facilitators and participants acknowledge limits of their knowledge, skills and attitudes and remain open to others’ experiences and perspectives. |  |  |
| **3. Curiosity**  Environment fosters open-ended questioning, multiple perspectives, alongside genuine unlearning, learning and relearning. |  |  |
| **4. Vulnerability**  Facilitators and participants model vulnerability, share uncertainties, and encourage honest dialogue even when challenging. |  |  |
| **5. Centering Lived Expertise**  Lived experience treated as valid evidence. Facilitators and participants feel empowered to shape dialogue and priorities. |  |  |
| **6. Reflexivity**  Facilitators and participants reflect on their own identities, biases, and intersectionality and how these dynamics shape dialogue outcomes. |  |  |
| **7. Power Awareness & Power-Sharing**  Facilitators name power dynamics, surface tensions, and create structures to equalize participation and invite quieter voices. |  |  |
| **8. Co-Creation of Action**  Dialogue leads to concrete, co-created actions, with mechanisms for follow-up and mutual accountability. |  |  |
| **9. Structured Process**  Session follows CDFA arc: connection and context setting, surfacing experience, identifying levers, co-creating individual, group or collective actions. |  |  |
| **10. Alignment with Equity Values**  Dialogue centers equity by prioritizing whose voices are heard, examining how language shapes discussion, and ensuring conversations genuinely advance structural change rather than remain performative. |  |  |
| **Total Score on above 10 items** | /30 |  |

**Overall Reflections:**

1. What worked well in this session?
2. What tensions emerged?
3. What would you do differently next time?
4. Were there moments when dialogue drifted away from CDFA principles?

**Action Items for Future Sessions:**

**I. ___________________________________________________________________**

**II. ___________________________________________________________________**

**III. ___________________________________________________________________**
