# Supplementary material for: Critical Dialogues for Action is a Research Methodology for Transforming Engagement into Impact
Source: Research Square preprint supplement (doi:10.21203/rs.3.rs-8553339/v1), 2026-02-11
Supplement: Supplementary file 2 [file df2bb55c2033a87f26e9e721.docx]

**Appendix A. Sample Titles from the CDFA Series**

The White Medical Gaze: Does it Exist?
Speaking Up: Worth the Risk!
Civility: From Words to Action
Dismantling Structural Stigma in Medical Education
Mindfully Muslim
Tips for Mentoring & Teaching Diverse Learners: Lessons from a Diversity Mentorship Program
A Conversation with Influencers and Leaders in Healthcare: Celebrating Black History Month
Moving Towards a Disability-Affirming Healthcare System: Let’s Talk About Ableism
Anti-Asian Racism in Medical Education: Coming Together to Learn, Reflect & Take Collective Action
Discrimination 911: How to Become an UPstander
More than Words: Diversity in PGME
Planetary Health Leadership: How Do We Align Our Values?
CDFA: Unlearning & Relearning
Global Healthcare Crisis: Challenges, Implications & Opportunities
Impact of Racism and Discrimination on Sense of Belonging and Wellness: A Learners Perspective
Health Promoting Learning & Work Environments
Performative Equity: Don’t Believe the Hype
Advocacy in Action: Striving for Mental Health Law Reform
Bringing the EDIA Lens to Faculty Promotions: Supporting Excellence
Residency Training Mexican Style: Harassment and Identity (De)formation
Voices from Palliative Care: The Perspectives of Caregivers, Patients, and a Storyteller
EDIA Leaders in Higher Education: Risks, Challenges, & Opportunities
Creating a System that Actually Responds to Societal Needs: Social Accountability in Action
Mindfulness Experience of Art: Social Justice and the Pursuit of ‘Being Free’
The Case for Collectivism
Planetary Health: The World is on Fire — What Can We Do in Healthcare to Make a Difference?
The Impact of Ableism in Medical Education: What Can We Do Differently?
Equity, Diversity, and Inclusion in Training and Education: Building Bridges, Breaking Barriers
The Feather or the Rock: How Do We Navigate the Tortuous Paths of Equity in Academia?
Language Diversity, Access to Care and Health Equity
Empowering Leadership: Championing Health Equity
Rethinking Weight: Confronting Stigma and Advancing Equity in Health Care
Making Higher Education Accessible, Using a Health Equity Lens
Bringing Research to Life: Importance of Research-Informed Advocacy
Addressing Ageism: Improving the Care, Experience, and Outcomes of Older Persons in Our Health System
Practicing Well: Supporting the Mental Health of Health Professionals and Learners
